# Supplementary material for: California Autism Prevalence Trends from 1931 to 2014 and Comparison to National ASD Data from IDEA and ADDM
Source: J Autism Dev Disord. 2018 Jul 5;48(12):4103–17. doi: 10.1007/s10803-018-3670-2 (PMC6223814; doi:10.1007/s10803-018-3670-2)
Supplement: Supplementary file 2 — Supplementary File S2 presents IDEA autism counts for all 50 states, tracked among 5 through 17 year-olds for report years 1991-2011 (XLSX 147 KB) [file 10803_2018_3670_MOESM2_ESM.xlsx]

## Sheet: Age5
ST	State\Report Year	1991	1992	1993	1994	1995	1996	1997	1998	1999	2000	2001	2002	2003	2004	2005	2006	2007	2008	2009	2010	2011
AL	Alabama	NaN	NaN	NaN	NaN	NaN	NaN	NaN	NaN	NaN	39	50	60	74	80	76	94	100	122	155	192	166
AK	Alaska	NaN	NaN	NaN	NaN	NaN	NaN	NaN	NaN	NaN	12	8	10	12	NaN	14	NaN	13	14	32	39	43
AZ	Arizona	NaN	NaN	NaN	NaN	NaN	NaN	NaN	NaN	NaN	94	128	152	157	229	287	NaN	368	NaN	462	NaN	NaN
AR	Arkansas	NaN	NaN	NaN	NaN	NaN	NaN	NaN	NaN	NaN	52	53	51	50	68	65	109	135	130	149	153	190
CA	California	NaN	NaN	NaN	NaN	NaN	NaN	NaN	NaN	NaN	1404	1691	1926	2288	2561	3123	3322	3777	4575	4596	5001	5129
CO	Colorado	NaN	NaN	NaN	NaN	NaN	NaN	NaN	NaN	NaN	33	28	29	50	59	65	116	131	165	150	206	188
CT	Connecticut	NaN	NaN	NaN	NaN	NaN	NaN	NaN	NaN	NaN	84	89	95	140	173	175	226	281	295	305	316	332
DE	Delaware	NaN	NaN	NaN	NaN	NaN	NaN	NaN	NaN	NaN	30	23	35	29	41	43	50	57	63	45	56	79
DC	District of Columbia	NaN	NaN	NaN	NaN	NaN	NaN	NaN	NaN	NaN	11	15	18	7	11	NaN	24	25	25	27	NaN	57
FL	Florida	NaN	NaN	NaN	NaN	NaN	NaN	NaN	NaN	NaN	390	409	491	561	617	733	853	872	1088	1148	1301	1372
GA	Georgia	NaN	NaN	NaN	NaN	NaN	NaN	NaN	NaN	NaN	176	193	220	235	291	320	353	345	405	382	405	385
HI	Hawaii	NaN	NaN	NaN	NaN	NaN	NaN	NaN	NaN	NaN	34	50	45	63	54	61	65	66	83	89	90	105
ID	Idaho	NaN	NaN	NaN	NaN	NaN	NaN	NaN	NaN	NaN	16	16	18	34	35	32	48	65	58	82	81	59
IL	Illinois	NaN	NaN	NaN	NaN	NaN	NaN	NaN	NaN	NaN	345	355	344	443	491	577	557	673	746	658	704	716
IN	Indiana	NaN	NaN	NaN	NaN	NaN	NaN	NaN	NaN	NaN	211	233	278	339	363	406	434	487	527	557	557	534
IA	Iowa	NaN	NaN	NaN	NaN	NaN	NaN	NaN	NaN	NaN	57	14	41	46	51	49	37	42	29	30	36	37
KS	Kansas	NaN	NaN	NaN	NaN	NaN	NaN	NaN	NaN	NaN	48	35	59	61	67	95	73	74	112	97	128	138
KY	Kentucky	NaN	NaN	NaN	NaN	NaN	NaN	NaN	NaN	NaN	75	75	74	100	109	134	126	161	180	209	198	223
LA	Louisiana	NaN	NaN	NaN	NaN	NaN	NaN	NaN	NaN	NaN	58	72	73	109	138	132	134	125	179	169	166	205
ME	Maine	NaN	NaN	NaN	NaN	NaN	NaN	NaN	NaN	NaN	66	61	82	91	108	123	159	165	173	190	164	193
MD	Maryland	NaN	NaN	NaN	NaN	NaN	NaN	NaN	NaN	NaN	155	189	245	266	275	283	294	322	325	355	356	365
MA	Massachusetts	NaN	NaN	NaN	NaN	NaN	NaN	NaN	NaN	NaN	79	260	315	404	430	497	575	689	741	793	821	821
MI	Michigan	NaN	NaN	NaN	NaN	NaN	NaN	NaN	NaN	NaN	302	342	366	420	487	557	602	650	708	652	610	616
MN	Minnesota	NaN	NaN	NaN	NaN	NaN	NaN	NaN	NaN	NaN	182	188	284	341	426	522	571	630	682	733	653	660
MS	Mississippi	NaN	NaN	NaN	NaN	NaN	NaN	NaN	NaN	NaN	15	19	25	34	19	34	46	57	76	78	84	124
MO	Missouri	NaN	NaN	NaN	NaN	NaN	NaN	NaN	NaN	NaN	134	105	101	153	183	200	188	222	229	239	249	300
MT	Montana	NaN	NaN	NaN	NaN	NaN	NaN	NaN	NaN	NaN	11	7	6	6	NaN	15	26	28	24	25	33	28
NE	Nebraska	NaN	NaN	NaN	NaN	NaN	NaN	NaN	NaN	NaN	23	23	35	45	55	68	72	101	87	96	118	110
NV	Nevada	NaN	NaN	NaN	NaN	NaN	NaN	NaN	NaN	NaN	40	58	79	118	112	165	217	219	223	244	246	277
NH	New Hampshire	NaN	NaN	NaN	NaN	NaN	NaN	NaN	NaN	NaN	17	26	32	32	41	48	48	84	83	88	80	97
NJ	New Jersey	NaN	NaN	NaN	NaN	NaN	NaN	NaN	NaN	NaN	397	447	464	570	650	734	831	948	985	1046	1099	975
NM	New Mexico	NaN	NaN	NaN	NaN	NaN	NaN	NaN	NaN	NaN	6	3	17	23	28	44	51	57	85	96	24	27
NY	New York	NaN	NaN	NaN	NaN	NaN	NaN	NaN	NaN	NaN	238	597	NaN	NaN	NaN	NaN	1520	1701	1646	1744	1762	1781
NC	North Carolina	NaN	NaN	NaN	NaN	NaN	NaN	NaN	NaN	NaN	135	160	182	245	281	321	353	448	516	500	524	595
ND	North Dakota	NaN	NaN	NaN	NaN	NaN	NaN	NaN	NaN	NaN	9	7	11	9	12	15	21	30	21	19	18	30
OH	Ohio	NaN	NaN	NaN	NaN	NaN	NaN	NaN	NaN	NaN	149	148	151	153	157	177	178	245	643	744	554	731
OK	Oklahoma	NaN	NaN	NaN	NaN	NaN	NaN	NaN	NaN	NaN	6	12	8	17	13	26	35	51	67	62	78	91
OR	Oregon	NaN	NaN	NaN	NaN	NaN	NaN	NaN	NaN	NaN	193	218	250	292	280	352	370	416	433	406	447	435
PA	Pennsylvania	NaN	NaN	NaN	NaN	NaN	NaN	NaN	NaN	NaN	271	374	451	618	645	825	1038	1046	1227	1250	1379	1355
RI	Rhode Island	NaN	NaN	NaN	NaN	NaN	NaN	NaN	NaN	NaN	13	36	30	32	41	53	48	56	75	81	86	73
SC	South Carolina	NaN	NaN	NaN	NaN	NaN	NaN	NaN	NaN	NaN	57	67	106	109	104	141	138	164	205	242	239	269
SD	South Dakota	NaN	NaN	NaN	NaN	NaN	NaN	NaN	NaN	NaN	15	17	25	30	31	29	36	44	42	41	48	65
TN	Tennessee	NaN	NaN	NaN	NaN	NaN	NaN	NaN	NaN	NaN	61	76	93	128	148	171	209	218	262	290	270	318
TX	Texas	NaN	NaN	NaN	NaN	NaN	NaN	NaN	NaN	NaN	568	579	614	805	895	1073	1230	1326	1643	1814	1694	1776
UT	Utah	NaN	NaN	NaN	NaN	NaN	NaN	NaN	NaN	NaN	30	43	54	64	89	104	128	123	155	150	167	146
VT	Vermont	NaN	NaN	NaN	NaN	NaN	NaN	NaN	NaN	NaN	3	4	12	15	27	18	25	NaN	NaN	16	35	NaN
VA	Virginia	NaN	NaN	NaN	NaN	NaN	NaN	NaN	NaN	NaN	151	166	223	247	287	323	309	391	490	512	510	551
WA	Washington	NaN	NaN	NaN	NaN	NaN	NaN	NaN	NaN	NaN	21	59	66	106	152	160	211	258	315	341	340	381
WV	West Virginia	NaN	NaN	NaN	NaN	NaN	NaN	NaN	NaN	NaN	13	13	24	22	29	28	NaN	41	52	42	56	50
WI	Wisconsin	NaN	NaN	NaN	NaN	NaN	NaN	NaN	NaN	NaN	138	161	165	182	218	252	271	291	314	331	339	340
WY	Wyoming	NaN	NaN	NaN	NaN	NaN	NaN	NaN	NaN	NaN	11	7	10	13	14	20	16	17	23	31	NaN	48

## Sheet: Age6
ST	State\Report Year	1991	1992	1993	1994	1995	1996	1997	1998	1999	2000	2001	2002	2003	2004	2005	2006	2007	2008	2009	2010	2011
AL	Alabama	NaN	15	16	29	49	47	59	61	61	47	69	88	108	135	130	146	166	184	228	276	290
AK	Alaska	1	2	6	8	8	10	21	24	26	30	21	27	25	34	27	28	33	44	38	48	50
AZ	Arizona	19	28	28	36	46	63	91	129	119	151	161	199	266	290	393	454	557	555	662	642	636
AR	Arkansas	6	6	20	32	29	54	58	83	74	95	81	84	89	92	115	106	174	218	207	216	247
CA	California	NaN	195	231	336	462	678	865	1186	1344	1539	1775	1996	2314	2667	3029	3465	3983	4478	5248	5359	5608
CO	Colorado	NaN	1	3	5	10	29	28	46	39	55	68	67	89	109	137	156	204	247	295	293	320
CT	Connecticut	8	28	29	44	69	68	94	124	131	146	160	186	197	249	314	343	378	422	485	452	511
DE	Delaware	NaN	9	1	9	13	21	29	29	32	22	26	29	32	34	47	56	59	64	69	58	88
DC	District of Columbia	NaN	NaN	NaN	2	4	6	6	8	10	11	16	16	11	NaN	17	NaN	21	35	31	41	43
FL	Florida	NaN	67	89	169	171	240	305	420	433	481	541	583	663	786	898	1080	1264	1376	1651	1756	1933
GA	Georgia	NaN	21	26	65	92	137	190	197	211	273	328	326	404	389	490	551	578	560	625	568	580
HI	Hawaii	NaN	10	7	17	19	15	21	31	22	42	51	63	54	72	65	76	73	83	114	98	117
ID	Idaho	2	5	4	8	12	23	20	20	26	28	21	32	30	53	72	62	73	93	107	127	107
IL	Illinois	NaN	4	9	96	144	232	292	343	429	499	514	511	611	705	795	945	996	959	1050	971	1031
IN	Indiana	24	20	43	76	91	117	153	200	235	254	322	361	420	467	514	576	621	686	732	725	729
IA	Iowa	NaN	4	14	22	25	38	43	49	30	33	38	54	62	65	64	56	46	35	35	40	41
KS	Kansas	NaN	14	7	15	19	24	42	49	77	84	79	87	87	86	98	141	125	125	178	142	194
KY	Kentucky	NaN	6	21	32	50	65	87	103	90	96	99	101	108	141	136	217	188	217	242	245	275
LA	Louisiana	NaN	55	62	63	57	78	89	110	111	102	108	152	125	154	160	173	181	189	239	225	220
ME	Maine	5	8	15	14	18	20	35	45	43	57	79	83	99	115	124	145	175	185	205	225	182
MD	Maryland	NaN	9	33	37	67	104	149	195	190	232	218	265	341	373	407	414	472	558	566	544	520
MA	Massachusetts	NaN	31	31	35	35	34	34	35	31	29	305	296	422	463	491	604	663	782	847	927	914
MI	Michigan	34	31	60	141	159	250	248	358	358	415	438	478	515	610	653	735	826	837	897	836	803
MN	Minnesota	37	37	49	54	92	110	138	196	233	240	341	323	451	467	564	695	732	843	901	904	851
MS	Mississippi	NaN	NaN	2	5	15	17	22	25	20	31	23	41	54	63	47	64	89	92	127	114	138
MO	Missouri	35	37	44	56	83	87	113	151	183	198	222	196	258	339	359	410	410	486	516	523	564
MT	Montana	NaN	5	10	17	13	7	19	11	12	24	21	32	20	NaN	29	35	43	46	42	65	31
NE	Nebraska	NaN	NaN	7	9	13	21	25	35	31	32	35	32	44	68	67	87	96	119	124	112	154
NV	Nevada	NaN	1	3	10	20	20	16	36	52	59	77	100	122	154	166	214	277	298	315	340	365
NH	New Hampshire	NaN	NaN	NaN	1	6	20	22	37	27	28	25	39	48	48	56	70	80	95	101	106	106
NJ	New Jersey	33	77	94	114	155	203	286	377	417	470	517	582	633	760	868	1002	1120	1133	1306	1284	1278
NM	New Mexico	6	1	4	2	8	16	14	17	15	14	16	11	31	34	44	63	69	89	100	175	199
NY	New York	NaN	165	203	205	269	294	361	455	539	664	765	881	990	1080	1182	1306	1791	1854	1958	2021	2028
NC	North Carolina	103	79	101	130	159	199	222	251	287	273	225	253	287	366	409	450	496	633	718	701	739
ND	North Dakota	NaN	NaN	1	3	3	6	17	10	10	12	17	13	19	16	NaN	20	31	39	33	29	26
OH	Ohio	NaN	3	14	21	28	45	83	177	249	306	336	450	543	618	646	798	801	874	1103	1114	1055
OK	Oklahoma	NaN	8	11	34	32	41	55	62	63	67	87	36	42	45	38	43	73	96	120	116	151
OR	Oregon	3	5	18	101	207	161	177	219	238	213	243	267	306	363	358	452	448	520	550	504	509
PA	Pennsylvania	NaN	74	61	168	179	226	261	379	370	427	451	534	651	839	932	1065	1265	1398	1595	1615	1804
RI	Rhode Island	1	5	5	14	15	17	23	37	25	34	41	54	50	62	66	89	101	69	108	96	116
SC	South Carolina	10	13	7	12	19	51	56	73	79	88	99	104	150	170	185	216	255	227	287	309	344
SD	South Dakota	5	4	4	9	10	5	13	13	20	23	27	26	29	37	40	47	35	54	56	49	63
TN	Tennessee	27	22	43	39	47	54	72	94	71	83	84	118	135	190	208	251	312	312	401	397	396
TX	Texas	NaN	144	168	221	220	363	427	548	625	738	821	864	967	1248	1366	1629	1938	2142	2532	2674	2677
UT	Utah	NaN	7	13	17	15	33	49	77	74	79	78	66	89	115	119	167	208	213	220	222	239
VT	Vermont	NaN	NaN	3	2	3	6	7	10	13	12	12	10	14	20	28	21	NaN	NaN	40	29	41
VA	Virginia	68	68	75	65	112	107	170	190	194	198	230	276	323	360	421	484	541	676	805	856	853
WA	Washington	NaN	40	11	41	53	80	124	165	169	122	132	148	164	226	276	323	364	436	476	512	509
WV	West Virginia	8	4	11	9	21	15	22	33	30	49	47	55	71	59	75	90	104	116	133	115	116
WI	Wisconsin	NaN	NaN	1	37	66	100	116	156	190	201	241	273	287	381	418	461	492	543	578	554	603
WY	Wyoming	NaN	4	1	NaN	2	10	3	10	11	9	13	9	16	22	19	27	NaN	34	30	NaN	51

## Sheet: Age7
ST	State\Report Year	1991	1992	1993	1994	1995	1996	1997	1998	1999	2000	2001	2002	2003	2004	2005	2006	2007	2008	2009	2010	2011
AL	Alabama	NaN	9	24	23	33	48	54	83	89	95	72	109	124	152	177	193	212	244	238	313	330
AK	Alaska	NaN	1	5	12	10	9	10	23	30	25	26	23	24	29	37	34	38	46	60	46	62
AZ	Arizona	22	25	32	26	39	66	76	88	136	131	169	193	239	309	355	441	547	592	657	739	722
AR	Arkansas	1	4	7	34	34	40	52	66	101	80	92	93	98	107	105	148	135	205	256	263	264
CA	California	NaN	193	234	276	393	547	779	991	1318	1509	1808	2013	2199	2552	2993	3328	3843	4376	4902	5570	5751
CO	Colorado	NaN	1	2	8	8	13	32	31	59	49	61	75	89	100	136	174	191	235	277	366	349
CT	Connecticut	16	8	34	39	51	85	79	114	143	132	163	187	223	225	293	345	381	437	472	514	496
DE	Delaware	NaN	NaN	NaN	17	11	15	21	29	30	32	20	34	31	39	42	51	64	75	65	77	65
DC	District of Columbia	NaN	NaN	NaN	4	8	8	9	8	6	14	15	20	25	20	22	NaN	NaN	27	45	41	45
FL	Florida	NaN	74	100	114	202	198	271	334	458	464	537	632	671	763	905	982	1179	1499	1573	1857	1938
GA	Georgia	NaN	41	19	41	65	110	162	206	237	259	346	399	439	513	552	678	753	760	693	813	763
HI	Hawaii	NaN	6	10	8	15	22	14	26	38	26	49	67	63	63	81	68	77	79	87	112	108
ID	Idaho	5	3	7	10	10	15	21	23	27	34	35	37	43	44	73	85	89	103	128	135	155
IL	Illinois	NaN	8	10	89	128	169	272	351	414	495	510	572	604	670	802	940	1080	1166	1146	1251	1188
IN	Indiana	23	40	32	75	99	117	150	198	248	307	335	403	441	514	582	625	709	775	791	853	861
IA	Iowa	NaN	2	13	22	27	36	47	50	53	37	42	74	79	76	78	60	64	42	41	43	44
KS	Kansas	NaN	4	19	19	19	17	31	58	60	90	95	95	93	110	104	127	158	155	154	215	178
KY	Kentucky	NaN	3	9	30	34	49	82	105	120	104	110	113	127	136	167	177	263	232	272	282	294
LA	Louisiana	NaN	49	64	68	67	69	83	94	126	128	121	125	168	149	162	179	203	223	224	268	266
ME	Maine	4	4	14	15	19	27	23	41	53	46	61	87	97	114	132	144	160	196	203	225	228
MD	Maryland	NaN	4	29	47	58	88	127	169	231	214	274	277	325	402	438	476	512	620	646	661	654
MA	Massachusetts	NaN	42	42	46	46	46	46	45	42	38	301	336	387	466	540	572	675	745	847	951	1022
MI	Michigan	25	43	35	165	171	188	295	323	399	417	485	524	557	609	786	813	899	1001	978	1019	983
MN	Minnesota	20	44	42	57	76	125	142	196	251	327	371	482	473	630	706	770	927	958	1074	1108	1115
MS	Mississippi	NaN	NaN	3	6	14	26	20	35	31	28	49	54	58	72	78	80	99	133	143	180	165
MO	Missouri	37	34	44	55	66	86	104	144	177	199	219	267	245	318	414	467	494	517	577	644	643
MT	Montana	NaN	NaN	5	10	15	15	6	22	13	16	30	26	36	22	NaN	30	39	51	55	52	43
NE	Nebraska	NaN	NaN	6	14	11	16	24	35	45	35	32	45	42	63	87	90	119	122	152	146	140
NV	Nevada	NaN	NaN	2	4	13	29	24	18	51	70	71	85	125	142	162	196	246	289	330	323	368
NH	New Hampshire	NaN	NaN	NaN	NaN	6	10	26	31	46	37	38	39	46	62	59	64	84	92	108	109	125
NJ	New Jersey	34	51	97	112	113	146	210	306	395	428	508	550	640	679	781	914	1023	1054	1230	1367	1358
NM	New Mexico	2	1	3	6	11	11	18	18	14	25	23	18	20	36	48	56	77	87	105	114	122
NY	New York	NaN	106	131	132	173	189	232	293	347	428	493	567	638	695	761	841	1643	1828	2008	2073	2091
NC	North Carolina	93	120	83	108	136	173	221	255	303	301	327	320	340	389	489	555	620	669	798	916	892
ND	North Dakota	NaN	2	3	2	3	3	7	18	9	13	15	21	16	20	NaN	18	30	37	50	34	40
OH	Ohio	NaN	3	16	24	35	30	75	148	217	325	409	435	565	648	766	826	887	974	1153	1284	1295
OK	Oklahoma	NaN	4	17	19	33	37	55	68	75	80	78	81	52	48	70	75	81	110	127	137	156
OR	Oregon	2	5	19	103	211	154	192	225	253	263	236	289	317	356	433	452	540	502	569	611	555
PA	Pennsylvania	NaN	61	58	135	182	183	249	313	444	446	489	548	640	766	968	1093	1253	1477	1583	1850	1876
RI	Rhode Island	2	1	4	5	15	19	16	24	41	33	47	58	64	58	84	97	108	119	77	125	118
SC	South Carolina	13	13	14	10	21	44	60	69	94	94	105	117	127	182	186	204	252	292	259	336	370
SD	South Dakota	1	6	2	3	9	10	6	17	16	26	20	27	29	34	40	42	47	46	57	57	56
TN	Tennessee	25	41	37	50	48	59	56	87	110	90	104	146	151	198	231	276	331	386	399	467	472
TX	Texas	NaN	173	175	204	284	301	443	544	641	735	815	927	1087	1235	1530	1622	1927	2310	2561	3008	3107
UT	Utah	NaN	7	11	12	16	20	36	52	73	87	97	90	95	118	143	179	213	264	265	291	286
VT	Vermont	NaN	NaN	4	4	5	2	7	12	17	29	15	17	18	17	23	31	NaN	NaN	45	60	46
VA	Virginia	68	69	79	77	73	125	139	183	220	236	232	278	341	391	465	519	624	690	858	1102	1185
WA	Washington	NaN	43	6	10	61	70	105	143	224	237	173	192	229	251	312	382	402	487	541	599	620
WV	West Virginia	10	12	8	10	13	26	19	27	39	36	60	49	62	76	65	92	100	119	118	145	129
WI	Wisconsin	NaN	NaN	NaN	46	49	92	120	136	204	228	258	304	323	345	438	481	521	579	623	675	657
WY	Wyoming	NaN	2	3	4	NaN	2	8	6	11	12	15	16	13	NaN	24	23	34	31	40	NaN	55

## Sheet: Age8
ST	State\Report Year	1991	1992	1993	1994	1995	1996	1997	1998	1999	2000	2001	2002	2003	2004	2005	2006	2007	2008	2009	2010	2011
AL	Alabama	1	1	13	33	31	41	52	67	99	99	109	86	137	146	182	228	252	279	333	323	364
AK	Alaska	1	2	2	4	12	8	8	12	23	31	30	25	27	34	37	44	40	47	58	65	68
AZ	Arizona	17	17	31	35	24	41	62	81	100	153	148	192	212	284	368	416	513	558	658	734	798
AR	Arkansas	1	2	9	18	35	38	43	58	71	109	94	109	108	118	130	139	177	169	231	282	306
CA	California	NaN	134	216	279	329	442	601	839	1079	1470	1664	1943	2110	2408	2774	3200	3613	4164	4661	5101	5838
CO	Colorado	NaN	2	NaN	2	9	11	20	37	42	67	47	68	100	96	126	158	205	240	265	325	404
CT	Connecticut	13	19	22	40	46	60	91	89	132	157	153	195	192	242	254	355	387	433	479	501	541
DE	Delaware	1	NaN	NaN	11	15	13	15	20	29	31	36	28	39	40	44	52	47	69	90	74	80
DC	District of Columbia	NaN	NaN	NaN	4	8	7	8	9	2	20	15	15	17	21	28	26	NaN	43	37	53	46
FL	Florida	NaN	52	87	128	137	209	213	313	374	485	507	581	679	724	809	941	1052	1316	1597	1716	2027
GA	Georgia	NaN	26	34	39	55	74	136	168	235	268	292	382	479	497	643	662	798	915	912	862	1025
HI	Hawaii	NaN	5	8	9	8	17	20	17	26	49	37	64	79	67	75	98	68	85	87	94	113
ID	Idaho	2	5	5	8	12	12	16	25	32	32	42	54	56	58	50	88	105	110	131	163	157
IL	Illinois	NaN	2	14	80	112	155	209	298	392	462	476	607	640	674	756	886	1020	1168	1275	1306	1443
IN	Indiana	18	40	42	65	96	110	146	179	251	308	382	417	485	502	601	673	736	828	893	863	967
IA	Iowa	NaN	7	11	23	38	33	37	50	55	56	50	90	95	84	87	78	68	49	49	51	51
KS	Kansas	NaN	9	13	29	27	20	22	39	69	75	103	101	102	105	128	116	149	181	179	178	233
KY	Kentucky	NaN	6	7	12	33	47	58	88	125	129	125	126	133	146	163	197	211	309	285	323	334
LA	Louisiana	NaN	52	58	70	72	67	71	90	98	131	132	125	136	186	137	165	203	230	250	264	319
ME	Maine	4	7	6	14	17	27	29	25	47	58	55	70	98	101	123	148	173	169	205	214	221
MD	Maryland	NaN	3	24	44	69	71	98	132	184	261	242	323	334	387	450	503	535	584	680	730	728
MA	Massachusetts	NaN	49	49	53	54	53	55	55	50	47	317	340	401	415	495	575	618	760	796	915	1032
MI	Michigan	24	40	50	135	173	181	220	357	355	460	461	551	613	658	751	890	933	1066	1135	1136	1143
MN	Minnesota	29	36	48	51	65	92	136	168	232	296	383	425	558	604	713	789	885	1013	1046	1170	1221
MS	Mississippi	NaN	NaN	5	12	13	20	36	32	42	45	54	57	64	69	87	103	111	139	188	199	220
MO	Missouri	43	39	45	52	59	69	95	140	145	201	227	244	297	279	354	460	476	548	580	640	694
MT	Montana	NaN	1	3	9	11	17	12	10	21	15	18	29	33	37	25	NaN	34	47	52	55	31
NE	Nebraska	NaN	NaN	NaN	8	14	12	22	25	35	47	46	52	60	50	84	100	101	147	155	178	174
NV	Nevada	NaN	NaN	5	3	5	14	30	30	17	54	67	78	101	130	154	175	211	248	302	338	355
NH	New Hampshire	NaN	NaN	NaN	NaN	4	9	12	31	37	58	49	44	44	60	72	65	89	106	109	121	130
NJ	New Jersey	21	47	62	97	109	120	149	203	340	426	467	532	578	652	697	846	935	1017	1182	1274	1427
NM	New Mexico	2	1	4	6	7	15	13	17	22	15	26	29	24	33	36	60	78	99	106	121	144
NY	New York	NaN	158	194	199	261	285	350	442	523	644	742	855	960	1047	1146	1267	1509	1713	1926	2074	2130
NC	North Carolina	65	88	120	92	116	156	190	235	275	274	358	378	414	456	572	677	795	861	931	1111	1218
ND	North Dakota	NaN	1	4	3	2	2	2	8	17	11	15	15	20	25	25	27	23	35	49	60	42
OH	Ohio	NaN	6	12	14	27	43	54	123	194	281	403	481	530	650	734	896	876	982	1179	1264	1424
OK	Oklahoma	NaN	6	9	20	20	37	49	58	72	82	95	97	123	140	161	214	218	161	146	172	183
OR	Oregon	4	1	27	96	195	153	172	228	247	265	290	290	335	385	418	512	530	593	554	626	673
PA	Pennsylvania	NaN	32	47	135	145	190	208	284	346	471	500	574	620	706	882	1083	1192	1397	1631	1748	1982
RI	Rhode Island	NaN	2	1	4	9	19	17	24	29	45	36	47	61	66	62	94	113	120	126	105	141
SC	South Carolina	13	15	16	18	15	34	42	73	73	90	96	124	125	135	189	195	235	258	309	298	396
SD	South Dakota	2	2	6	4	4	12	13	8	17	24	22	25	28	30	35	45	50	52	47	65	70
TN	Tennessee	27	30	39	43	47	49	70	63	99	120	100	136	183	175	235	293	329	388	456	465	550
TX	Texas	NaN	131	198	203	243	327	348	484	582	727	804	949	1110	1237	1424	1708	1844	2230	2579	2824	3354
UT	Utah	NaN	6	12	12	18	18	24	45	63	80	102	109	108	125	149	184	225	271	316	316	364
VT	Vermont	NaN	1	1	6	7	4	7	10	13	20	32	14	23	24	15	24	NaN	NaN	61	60	73
VA	Virginia	60	78	62	89	91	106	145	160	217	237	295	301	368	409	496	562	638	780	897	1057	1199
WA	Washington	NaN	52	6	8	23	66	76	127	170	231	263	218	260	303	319	384	450	509	579	666	712
WV	West Virginia	4	11	10	10	10	14	25	24	30	45	41	57	53	67	83	77	98	108	128	126	153
WI	Wisconsin	NaN	2	NaN	48	57	62	103	150	164	238	260	298	344	364	393	475	511	576	650	660	735
WY	Wyoming	NaN	2	3	3	3	1	2	9	8	13	16	17	19	18	18	19	36	42	42	NaN	65

## Sheet: Age9
ST	State\Report Year	1991	1992	1993	1994	1995	1996	1997	1998	1999	2000	2001	2002	2003	2004	2005	2006	2007	2008	2009	2010	2011
AL	Alabama	NaN	12	6	21	41	31	52	49	76	105	119	135	127	178	194	223	277	341	365	433	427
AK	Alaska	NaN	NaN	2	2	6	12	13	10	12	26	36	35	29	34	37	47	51	50	56	77	76
AZ	Arizona	11	18	18	33	34	35	52	67	88	111	161	163	219	258	318	390	475	529	623	692	800
AR	Arkansas	3	2	6	18	20	38	39	44	68	76	111	103	116	114	136	145	166	189	190	255	317
CA	California	NaN	137	159	229	300	366	500	649	902	1175	1610	1767	2092	2310	2572	3023	3503	3851	4398	4823	5379
CO	Colorado	NaN	1	3	5	5	11	17	22	51	58	70	60	81	127	126	156	190	231	275	308	398
CT	Connecticut	13	19	22	27	46	54	73	100	96	147	169	176	209	220	279	290	369	414	478	519	528
DE	Delaware	NaN	NaN	NaN	11	13	17	13	14	19	27	34	41	29	43	39	48	52	48	72	83	83
DC	District of Columbia	NaN	NaN	NaN	3	8	7	6	6	1	8	24	16	19	NaN	26	29	20	NaN	39	39	60
FL	Florida	NaN	50	63	120	132	152	230	236	339	401	528	532	607	718	738	875	1025	1164	1409	1779	1864
GA	Georgia	NaN	24	17	59	36	59	98	152	196	238	307	327	458	540	574	716	755	868	1033	1118	1128
HI	Hawaii	NaN	1	5	6	10	9	21	16	20	28	61	51	64	78	74	77	99	71	77	93	93
ID	Idaho	4	2	7	5	11	13	19	17	24	36	43	54	66	79	84	65	106	127	143	173	182
IL	Illinois	NaN	NaN	6	86	97	125	175	244	340	424	437	562	665	693	734	831	970	1138	1281	1385	1509
IN	Indiana	15	25	45	65	86	112	130	160	212	281	353	443	487	569	590	677	755	832	927	967	946
IA	Iowa	NaN	2	22	20	31	40	38	41	48	50	53	98	105	100	82	84	78	55	55	57	56
KS	Kansas	NaN	5	17	21	37	23	22	26	47	80	86	113	111	119	116	146	142	172	210	194	215
KY	Kentucky	NaN	5	11	10	16	39	49	68	87	133	149	142	145	155	185	187	251	256	369	363	380
LA	Louisiana	NaN	35	59	58	71	77	71	81	95	102	141	162	146	172	186	189	210	254	293	336	353
ME	Maine	NaN	5	10	9	12	18	29	30	30	51	64	56	78	108	109	141	156	192	180	221	225
MD	Maryland	NaN	1	15	35	53	77	79	109	154	202	304	290	367	363	419	481	534	609	651	737	794
MA	Massachusetts	NaN	52	51	57	57	58	59	61	59	54	318	332	394	427	467	550	671	655	809	897	984
MI	Michigan	13	28	51	150	148	191	201	266	375	389	502	539	613	699	762	849	969	1037	1149	1225	1187
MN	Minnesota	20	32	45	53	63	85	108	157	198	279	371	451	514	586	682	801	881	990	1101	1120	1252
MS	Mississippi	NaN	NaN	1	10	23	18	20	36	35	44	58	59	65	76	80	97	122	144	201	241	266
MO	Missouri	23	38	42	39	57	63	76	114	138	159	225	243	268	323	311	415	513	526	590	650	698
MT	Montana	NaN	2	2	NaN	9	10	15	15	10	24	14	21	23	32	41	NaN	25	36	47	62	38
NE	Nebraska	NaN	NaN	6	1	11	16	16	26	29	37	53	49	64	72	68	99	124	130	172	175	212
NV	Nevada	NaN	NaN	4	6	7	7	18	32	36	35	60	87	98	113	135	173	200	229	273	320	361
NH	New Hampshire	NaN	NaN	NaN	1	9	11	14	14	38	45	62	54	61	59	72	87	100	109	127	129	141
NJ	New Jersey	19	47	56	61	104	108	118	161	232	354	444	469	536	609	687	706	877	921	1040	1214	1292
NM	New Mexico	2	2	3	7	11	12	14	17	18	22	19	34	38	32	37	47	71	87	114	124	140
NY	New York	NaN	160	197	239	314	342	420	530	627	773	890	1025	1152	1256	1375	1519	1457	1554	1774	1993	2134
NC	North Carolina	59	69	105	127	98	123	164	200	253	253	365	379	433	476	531	654	761	861	955	1006	1188
ND	North Dakota	NaN	1	3	10	2	4	3	2	9	16	10	19	19	26	27	28	41	30	41	53	70
OH	Ohio	NaN	1	16	14	17	40	67	91	173	256	341	509	568	600	759	828	911	953	1181	1301	1345
OK	Oklahoma	NaN	NaN	10	14	19	20	38	52	64	80	90	105	121	144	162	186	233	261	317	332	440
OR	Oregon	NaN	4	13	80	179	142	167	195	239	269	289	334	302	383	438	467	555	564	614	597	664
PA	Pennsylvania	NaN	39	27	121	136	145	201	225	303	404	499	550	637	696	753	978	1208	1303	1521	1756	1914
RI	Rhode Island	NaN	1	2	3	5	10	23	21	26	36	49	42	56	77	81	78	96	131	131	143	148
SC	South Carolina	11	14	18	18	22	23	40	51	81	87	112	99	119	123	148	196	211	248	280	337	342
SD	South Dakota	3	3	2	5	6	5	12	16	12	23	27	25	26	33	31	38	47	52	58	51	75
TN	Tennessee	26	32	29	38	39	51	59	74	73	102	139	125	165	213	203	280	343	395	488	529	538
TX	Texas	NaN	127	163	224	240	286	355	399	528	630	783	911	1076	1256	1379	1604	1898	2068	2450	2874	3153
UT	Utah	NaN	11	9	14	14	21	21	24	50	65	100	103	124	128	148	171	205	238	310	327	368
VT	Vermont	NaN	NaN	1	3	9	9	11	9	11	18	26	39	17	27	25	17	NaN	NaN	60	80	69
VA	Virginia	52	63	67	68	93	95	105	157	208	249	280	360	362	452	511	590	723	776	920	1104	1147
WA	Washington	NaN	52	1	9	24	38	88	104	161	200	277	329	311	358	434	422	538	574	644	722	860
WV	West Virginia	5	13	13	6	11	11	17	27	16	26	48	42	53	59	67	81	78	97	108	146	134
WI	Wisconsin	NaN	1	2	31	54	75	68	116	168	197	263	300	327	378	409	448	502	563	625	705	708
WY	Wyoming	NaN	1	2	5	3	5	3	4	8	8	14	18	17	22	NaN	18	28	47	46	NaN	60

## Sheet: Age10
ST	State\Report Year	1991	1992	1993	1994	1995	1996	1997	1998	1999	2000	2001	2002	2003	2004	2005	2006	2007	2008	2009	2010	2011
AL	Alabama	NaN	5	14	8	27	47	35	51	61	70	114	127	146	127	193	207	252	315	387	400	463
AK	Alaska	NaN	1	3	2	3	8	12	12	14	15	27	39	37	32	41	43	50	57	56	62	73
AZ	Arizona	8	7	21	25	29	40	47	57	79	108	119	185	197	250	285	351	428	457	587	674	746
AR	Arkansas	2	2	3	7	23	24	37	39	51	70	84	119	103	123	119	152	174	189	209	219	289
CA	California	NaN	136	135	180	256	323	387	535	729	992	1299	1727	1906	2211	2451	2758	3266	3734	4072	4615	5062
CO	Colorado	NaN	2	3	5	5	10	20	18	28	52	61	85	70	94	150	132	162	227	254	329	351
CT	Connecticut	6	15	26	26	35	49	64	73	104	108	158	184	183	213	241	303	340	402	453	503	544
DE	Delaware	NaN	1	1	14	9	15	16	15	15	20	30	33	43	34	43	43	52	63	55	74	93
DC	District of Columbia	NaN	NaN	NaN	NaN	5	8	6	4	1	10	11	22	11	NaN	NaN	NaN	24	NaN	29	36	44
FL	Florida	NaN	41	58	96	132	130	168	227	248	331	410	563	585	648	741	750	921	1105	1276	1522	1862
GA	Georgia	NaN	15	13	33	54	48	76	101	164	197	262	346	389	500	613	650	764	814	916	1096	1234
HI	Hawaii	NaN	6	3	3	7	10	11	21	17	26	38	69	56	71	83	71	80	99	79	80	90
ID	Idaho	1	3	4	9	6	12	12	19	16	28	40	60	63	77	95	91	86	127	157	164	193
IL	Illinois	NaN	1	4	67	99	107	135	197	278	360	371	532	607	719	748	783	907	1034	1228	1386	1429
IN	Indiana	17	28	29	72	84	91	117	150	185	262	332	404	495	542	648	665	733	813	886	970	1002
IA	Iowa	NaN	9	14	25	23	34	44	40	50	54	46	109	107	115	100	77	83	59	58	60	59
KS	Kansas	NaN	8	7	20	25	32	25	28	30	57	88	94	114	121	131	126	156	148	209	238	226
KY	Kentucky	NaN	6	8	12	19	11	41	50	68	100	138	147	152	160	162	199	202	272	283	380	376
LA	Louisiana	NaN	35	42	59	58	62	81	70	81	101	115	151	164	154	142	180	191	208	264	305	337
ME	Maine	2	3	5	10	11	16	21	31	33	37	58	69	64	85	113	121	153	170	198	198	220
MD	Maryland	NaN	3	11	22	55	62	86	85	133	181	234	350	342	393	403	433	509	589	647	658	749
MA	Massachusetts	NaN	51	52	56	58	58	60	62	63	60	290	339	409	424	463	518	611	734	707	916	993
MI	Michigan	15	19	38	139	163	164	212	247	289	404	419	547	618	652	799	841	930	1042	1093	1211	1307
MN	Minnesota	11	23	43	43	63	73	96	125	190	223	332	432	509	595	665	750	884	972	1085	1157	1201
MS	Mississippi	NaN	NaN	1	8	18	25	21	20	36	35	44	63	57	71	78	85	111	139	199	238	288
MO	Missouri	15	28	46	47	42	59	74	84	118	157	201	252	256	301	346	342	450	532	569	646	683
MT	Montana	NaN	3	5	2	NaN	9	10	14	16	15	23	14	17	21	30	39	34	NaN	28	54	48
NE	Nebraska	NaN	NaN	3	6	4	11	19	18	25	31	38	54	51	68	84	86	110	118	146	193	186
NV	Nevada	NaN	1	3	4	8	9	11	21	34	39	39	74	89	101	136	137	201	207	249	291	333
NH	New Hampshire	NaN	NaN	NaN	NaN	4	12	13	18	15	45	49	67	60	64	69	91	96	95	121	120	152
NJ	New Jersey	11	39	47	62	64	98	105	132	186	245	360	443	497	540	628	691	736	833	938	1096	1215
NM	New Mexico	NaN	NaN	5	3	9	15	10	14	19	22	24	25	33	39	43	45	53	96	111	131	130
NY	New York	NaN	149	183	221	289	315	387	488	578	712	820	945	1062	1158	1267	1401	1282	1464	1612	1820	2020
NC	North Carolina	55	62	80	107	131	103	131	183	217	217	321	392	401	464	517	589	724	817	922	1014	1083
ND	North Dakota	NaN	NaN	2	3	11	3	5	3	6	11	18	17	25	22	27	31	35	49	43	50	58
OH	Ohio	NaN	1	9	15	23	24	49	117	128	207	326	419	582	634	679	847	848	1008	1132	1280	1399
OK	Oklahoma	NaN	4	6	13	17	24	22	42	54	73	85	94	116	126	170	172	205	256	281	336	371
OR	Oregon	1	2	11	69	157	131	148	173	198	243	290	325	362	339	410	494	518	613	604	634	610
PA	Pennsylvania	NaN	28	27	87	119	141	150	212	230	342	417	551	590	678	736	834	1080	1318	1429	1629	1880
RI	Rhode Island	NaN	NaN	2	2	4	6	12	27	26	32	45	52	54	63	82	98	98	104	136	137	148
SC	South Carolina	6	12	18	18	20	27	29	56	62	81	90	116	106	115	136	156	217	224	264	305	350
SD	South Dakota	3	3	3	6	4	5	5	16	17	22	24	27	30	26	35	33	44	52	53	57	52
TN	Tennessee	27	28	41	29	38	36	55	67	77	98	116	160	154	195	246	253	324	381	469	541	595
TX	Texas	NaN	122	141	166	250	253	322	386	430	591	719	862	1035	1201	1391	1501	1742	2116	2315	2680	3123
UT	Utah	NaN	5	13	17	17	16	19	21	31	54	74	99	114	144	144	182	199	219	275	338	344
VT	Vermont	NaN	NaN	NaN	4	5	9	12	12	12	22	21	29	44	19	25	26	NaN	NaN	66	65	90
VA	Virginia	37	49	68	66	70	99	95	109	163	221	256	321	379	416	500	542	617	772	825	1005	1145
WA	Washington	NaN	53	7	8	16	41	50	94	124	170	215	300	343	352	413	481	459	614	621	697	795
WV	West Virginia	8	11	15	12	8	12	15	19	28	20	26	51	45	57	64	70	88	77	101	116	153
WI	Wisconsin	NaN	NaN	1	31	40	65	75	74	139	192	215	283	327	358	418	423	469	541	608	660	762
WY	Wyoming	NaN	NaN	1	2	5	5	5	3	4	10	8	16	20	NaN	NaN	28	NaN	32	55	NaN	64

## Sheet: Age11
ST	State\Report Year	1991	1992	1993	1994	1995	1996	1997	1998	1999	2000	2001	2002	2003	2004	2005	2006	2007	2008	2009	2010	2011
AL	Alabama	1	3	6	24	11	27	54	38	57	63	78	125	141	163	152	219	210	282	339	409	410
AK	Alaska	NaN	1	1	1	3	5	9	11	9	11	18	27	39	39	30	44	37	52	68	61	71
AZ	Arizona	9	17	12	22	25	30	47	56	67	77	119	141	199	207	277	325	395	435	504	615	731
AR	Arkansas	3	3	2	9	12	24	24	36	47	58	70	95	123	102	139	131	171	187	212	228	215
CA	California	NaN	104	147	161	190	254	351	442	591	782	1077	1390	1799	2028	2329	2592	2918	3432	3907	4227	4801
CO	Colorado	NaN	1	3	3	4	11	15	24	24	36	49	63	92	90	107	159	148	189	252	268	355
CT	Connecticut	5	4	16	31	31	34	61	72	81	110	113	172	201	193	231	247	288	370	445	473	541
DE	Delaware	NaN	NaN	NaN	15	14	9	13	18	13	15	18	33	35	44	39	45	47	48	66	59	76
DC	District of Columbia	NaN	NaN	NaN	5	9	9	8	4	NaN	10	13	13	17	NaN	NaN	NaN	27	28	20	32	38
FL	Florida	NaN	54	47	80	114	140	142	170	245	264	344	445	571	603	670	776	778	999	1193	1344	1633
GA	Georgia	NaN	20	8	31	28	60	60	67	113	151	213	283	388	422	515	669	683	785	861	969	1166
HI	Hawaii	NaN	4	6	2	3	6	11	14	24	24	30	49	73	59	72	72	78	87	93	84	82
ID	Idaho	3	3	5	5	10	7	14	15	20	19	34	47	70	66	89	104	96	102	146	159	173
IL	Illinois	NaN	3	2	61	82	109	137	145	209	305	314	487	574	649	773	811	827	953	1121	1298	1429
IN	Indiana	11	20	32	63	85	93	105	139	165	212	293	373	464	546	602	714	725	795	864	924	1042
IA	Iowa	NaN	10	20	20	28	30	37	45	39	46	51	100	113	111	119	87	76	58	59	59	59
KS	Kansas	NaN	6	12	14	25	22	25	29	32	38	59	94	97	122	121	137	140	161	165	219	258
KY	Kentucky	NaN	5	6	10	12	23	17	48	62	76	103	138	153	160	157	171	222	240	282	288	389
LA	Louisiana	NaN	22	42	44	55	59	61	82	71	85	108	115	163	170	137	147	188	187	219	273	310
ME	Maine	1	3	2	5	10	11	19	21	34	30	33	67	74	75	90	115	130	155	172	192	207
MD	Maryland	NaN	2	22	22	29	56	77	96	106	155	215	277	392	356	415	412	445	555	612	686	663
MA	Massachusetts	NaN	50	49	55	55	57	58	62	62	62	193	338	384	433	443	503	558	652	765	746	944
MI	Michigan	15	20	24	118	145	169	166	227	262	323	449	454	602	676	736	863	915	991	1124	1145	1270
MN	Minnesota	16	21	34	52	49	75	87	112	146	209	260	392	489	577	660	739	808	936	1026	1117	1196
MS	Mississippi	NaN	NaN	1	10	17	24	27	20	20	37	37	43	65	60	75	78	93	137	176	226	260
MO	Missouri	22	25	35	55	46	44	60	74	101	116	175	208	274	271	321	394	380	485	563	603	685
MT	Montana	NaN	2	NaN	3	3	3	14	7	17	19	17	24	16	NaN	NaN	27	48	NaN	42	30	33
NE	Nebraska	NaN	NaN	5	6	7	6	13	18	18	24	41	54	53	61	83	95	102	132	136	162	206
NV	Nevada	NaN	2	4	6	4	7	10	11	18	41	52	43	84	105	109	150	149	201	206	241	297
NH	New Hampshire	NaN	NaN	NaN	NaN	1	7	14	14	17	21	45	50	70	66	75	70	111	109	105	125	149
NJ	New Jersey	4	25	57	61	64	63	102	118	150	201	257	371	454	510	563	649	716	699	873	967	1119
NM	New Mexico	NaN	NaN	NaN	6	5	11	16	11	18	22	26	24	25	33	36	42	49	66	116	116	136
NY	New York	NaN	158	194	248	327	355	439	552	653	806	927	1068	1201	1309	1433	1584	1274	1306	1532	1681	1850
NC	North Carolina	57	50	64	79	113	139	103	133	189	189	298	330	416	426	500	572	641	771	855	969	1088
ND	North Dakota	NaN	1	1	2	5	11	3	5	4	8	13	19	19	23	27	30	36	44	52	44	59
OH	Ohio	NaN	3	9	10	17	25	38	82	130	162	244	383	475	634	705	760	883	945	1143	1239	1381
OK	Oklahoma	NaN	3	11	10	19	20	28	23	49	56	78	98	104	128	139	167	189	217	290	312	373
OR	Oregon	3	3	9	62	123	107	140	153	182	218	267	316	359	405	377	461	524	553	630	617	664
PA	Pennsylvania	NaN	24	25	96	89	128	148	158	225	228	359	433	592	660	719	798	895	1157	1398	1501	1754
RI	Rhode Island	NaN	1	1	3	3	6	7	15	25	31	32	46	54	62	70	97	114	117	113	150	148
SC	South Carolina	5	7	9	19	13	26	31	37	59	58	89	97	122	113	128	158	164	229	234	281	326
SD	South Dakota	2	3	2	2	8	6	9	6	14	19	24	22	30	33	33	36	35	42	45	53	60
TN	Tennessee	18	20	33	45	27	33	47	52	67	82	96	120	191	180	214	254	282	356	417	505	602
TX	Texas	NaN	103	129	152	188	272	273	336	422	455	626	789	940	1132	1309	1448	1621	1911	2244	2503	2890
UT	Utah	NaN	8	6	13	16	19	17	22	28	41	56	86	102	132	161	168	212	223	253	316	354
VT	Vermont	NaN	NaN	NaN	4	7	5	11	16	21	15	22	20	30	42	19	30	NaN	NaN	58	72	70
VA	Virginia	34	35	37	70	70	76	98	88	124	167	226	297	352	426	456	512	582	657	827	891	1070
WA	Washington	NaN	52	3	11	11	28	51	58	114	134	191	230	322	373	362	431	521	485	631	699	736
WV	West Virginia	6	15	14	10	12	8	11	15	21	26	23	30	48	44	50	62	75	90	83	106	121
WI	Wisconsin	NaN	1	2	23	32	49	67	90	88	150	224	235	311	367	391	434	459	510	560	612	689
WY	Wyoming	NaN	1	1	3	2	4	5	5	4	2	12	9	18	21	16	29	29	34	39	NaN	60

## Sheet: Age12
ST	State\Report Year	1991	1992	1993	1994	1995	1996	1997	1998	1999	2000	2001	2002	2003	2004	2005	2006	2007	2008	2009	2010	2011
AL	Alabama	NaN	5	3	12	30	11	31	55	43	60	66	79	123	145	171	162	221	215	299	372	426
AK	Alaska	NaN	NaN	3	2	3	4	7	12	14	10	14	19	29	40	36	32	49	40	55	74	69
AZ	Arizona	11	7	19	15	23	30	36	50	59	78	84	122	158	232	236	322	343	398	477	551	650
AR	Arkansas	3	5	6	8	7	13	25	24	41	50	63	70	107	134	111	142	134	173	200	213	237
CA	California	NaN	102	119	158	170	205	288	384	449	643	894	1171	1472	1900	2142	2501	2780	3122	3630	4059	4367
CO	Colorado	NaN	NaN	5	3	6	8	14	14	28	25	38	66	73	103	105	130	166	159	229	285	309
CT	Connecticut	10	6	8	20	31	30	42	58	74	91	116	121	185	213	221	266	297	328	393	476	494
DE	Delaware	NaN	NaN	NaN	12	11	16	8	15	17	14	18	21	34	35	46	43	50	49	49	67	60
DC	District of Columbia	NaN	NaN	NaN	1	9	5	9	6	4	5	10	13	22	14	NaN	22	NaN	26	34	22	35
FL	Florida	NaN	30	66	72	92	124	148	144	175	250	270	356	440	568	606	657	812	843	1026	1197	1390
GA	Georgia	NaN	13	12	18	30	39	71	54	84	113	182	258	336	403	461	571	709	724	799	875	994
HI	Hawaii	NaN	3	3	5	2	2	8	11	11	25	26	36	51	77	61	75	74	82	84	84	83
ID	Idaho	2	4	5	6	4	12	9	17	15	23	23	45	61	72	69	97	121	115	115	163	174
IL	Illinois	NaN	4	4	58	73	94	118	147	163	216	222	411	524	606	659	810	828	879	1032	1210	1356
IN	Indiana	13	20	24	57	67	94	92	107	149	191	245	330	413	500	595	642	761	788	851	897	955
IA	Iowa	NaN	7	12	27	23	32	35	40	43	34	39	104	105	112	104	109	89	58	57	58	58
KS	Kansas	NaN	3	12	15	16	23	17	30	38	36	40	64	99	100	127	122	145	156	170	171	225
KY	Kentucky	NaN	NaN	5	9	12	14	23	31	52	49	79	100	137	157	169	151	178	236	253	299	322
LA	Louisiana	NaN	26	33	41	42	54	60	66	82	71	93	115	119	180	150	139	158	201	200	220	274
ME	Maine	1	1	3	4	6	12	15	17	24	41	34	36	73	85	80	99	126	150	160	177	200
MD	Maryland	NaN	3	13	19	41	45	66	92	107	114	173	242	283	415	370	428	435	514	585	644	716
MA	Massachusetts	NaN	29	28	31	32	32	34	35	35	36	177	218	359	397	434	471	528	593	666	787	800
MI	Michigan	13	23	25	75	123	150	175	188	240	285	357	494	513	657	735	809	913	980	1017	1137	1158
MN	Minnesota	12	19	20	37	64	59	90	115	131	162	245	328	440	542	652	711	806	867	979	1078	1150
MS	Mississippi	NaN	NaN	NaN	7	19	16	26	30	20	17	43	40	51	64	56	71	87	98	156	206	261
MO	Missouri	14	19	23	38	58	54	60	61	85	122	137	193	228	280	283	359	412	399	516	593	637
MT	Montana	NaN	2	2	1	3	3	1	12	9	17	16	13	23	NaN	24	26	35	47	35	47	18
NE	Nebraska	NaN	NaN	3	5	8	8	8	15	21	21	33	40	58	65	60	88	101	109	146	149	181
NV	Nevada	NaN	NaN	4	4	8	5	7	12	13	28	45	52	52	99	125	128	151	155	210	201	266
NH	New Hampshire	NaN	NaN	NaN	2	1	5	7	15	20	17	24	55	59	80	69	79	93	98	116	112	141
NJ	New Jersey	9	27	28	61	56	63	67	114	134	167	209	255	386	459	521	571	653	638	738	911	1012
NM	New Mexico	1	NaN	2	2	5	7	15	15	15	17	24	20	25	29	35	46	50	68	86	118	120
NY	New York	NaN	61	71	98	142	127	139	206	187	223	274	340	408	513	603	713	1150	1276	1342	1553	1689
NC	North Carolina	49	56	51	71	76	120	135	105	142	142	237	313	354	450	438	524	607	664	792	866	998
ND	North Dakota	NaN	1	2	1	2	5	10	3	7	5	6	14	23	21	25	28	34	37	50	57	52
OH	Ohio	NaN	NaN	8	6	13	20	34	61	102	164	196	289	446	548	716	766	795	953	1079	1235	1291
OK	Oklahoma	NaN	2	7	15	16	19	22	29	24	56	61	77	100	112	132	153	181	201	234	300	331
OR	Oregon	1	3	10	52	136	87	119	151	154	206	228	290	327	383	423	412	496	533	570	642	644
PA	Pennsylvania	NaN	20	25	60	92	93	117	161	169	236	257	370	471	637	692	785	871	981	1241	1462	1616
RI	Rhode Island	NaN	NaN	2	2	7	3	6	7	19	29	31	41	48	58	73	81	105	124	113	119	167
SC	South Carolina	9	5	8	11	19	22	37	39	41	70	63	94	103	122	119	140	173	172	236	248	297
SD	South Dakota	NaN	2	3	1	2	9	7	11	6	19	18	26	27	31	34	36	35	35	39	46	53
TN	Tennessee	14	15	21	36	44	29	38	49	57	72	91	107	148	200	181	242	277	316	384	441	521
TX	Texas	NaN	107	114	141	176	200	274	293	357	419	493	699	861	1005	1224	1348	1563	1748	2019	2351	2654
UT	Utah	NaN	12	12	12	12	14	17	30	26	29	47	63	96	115	156	194	188	215	250	295	333
VT	Vermont	NaN	2	NaN	3	6	8	8	13	18	14	20	22	19	29	42	NaN	NaN	NaN	45	65	72
VA	Virginia	33	34	40	40	67	72	82	96	103	116	172	257	303	366	458	479	555	636	707	867	948
WA	Washington	NaN	24	1	6	20	19	38	62	78	128	156	203	255	354	398	372	468	535	513	672	740
WV	West Virginia	7	7	7	7	9	12	10	9	18	22	24	23	35	54	50	54	61	78	98	83	104
WI	Wisconsin	NaN	2	1	28	28	49	51	80	103	110	171	251	279	340	395	427	439	493	543	594	651
WY	Wyoming	NaN	NaN	2	2	5	2	4	6	5	5	2	12	12	22	23	20	40	30	35	NaN	61

## Sheet: Age13
ST	State\Report Year	1991	1992	1993	1994	1995	1996	1997	1998	1999	2000	2001	2002	2003	2004	2005	2006	2007	2008	2009	2010	2011
AL	Alabama	1	4	8	11	13	27	11	29	57	48	58	71	89	141	161	173	175	235	228	307	379
AK	Alaska	NaN	NaN	NaN	2	1	2	5	6	10	15	10	14	20	33	42	39	37	46	40	63	74
AZ	Arizona	12	13	12	17	17	25	33	36	58	59	87	107	139	176	257	260	336	366	429	502	590
AR	Arkansas	1	2	4	6	8	11	9	28	23	39	48	64	75	110	138	116	146	130	182	207	228
CA	California	NaN	97	109	130	175	185	232	333	415	485	701	995	1223	1599	2006	2248	2654	2904	3249	3732	4189
CO	Colorado	NaN	2	1	5	5	9	7	15	20	30	29	42	79	72	114	111	155	181	179	246	311
CT	Connecticut	6	8	11	9	23	36	33	47	58	80	100	117	131	199	231	235	272	326	342	407	491
DE	Delaware	NaN	NaN	NaN	9	9	11	17	9	18	18	14	18	21	35	35	47	45	53	47	54	69
DC	District of Columbia	NaN	NaN	NaN	1	NaN	3	5	2	8	4	7	12	12	NaN	12	NaN	NaN	NaN	28	33	26
FL	Florida	NaN	38	32	76	74	100	126	149	159	178	259	269	369	452	586	669	680	834	927	1076	1260
GA	Georgia	NaN	16	13	23	22	32	41	60	72	90	133	209	294	362	467	506	591	703	738	827	916
HI	Hawaii	NaN	3	3	4	5	4	4	5	12	13	29	33	42	55	85	61	77	71	78	78	86
ID	Idaho	NaN	4	4	7	7	5	14	11	18	15	26	33	45	68	85	68	119	125	118	112	169
IL	Illinois	NaN	1	2	54	67	79	102	130	174	186	192	339	434	547	631	714	858	873	947	1100	1234
IN	Indiana	12	18	18	49	68	68	94	108	113	167	221	274	363	439	536	636	666	818	801	878	917
IA	Iowa	NaN	7	13	19	29	26	34	33	41	45	36	95	111	107	114	90	102	59	59	57	58
KS	Kansas	NaN	4	10	16	16	14	17	24	35	42	37	45	70	108	103	132	128	148	162	178	187
KY	Kentucky	NaN	NaN	1	8	12	15	16	26	27	43	54	81	115	137	157	164	171	190	258	269	315
LA	Louisiana	NaN	21	32	35	44	44	57	60	66	78	75	95	113	120	148	167	148	157	197	206	228
ME	Maine	1	NaN	2	5	7	8	16	17	23	27	46	37	44	75	95	91	111	120	155	168	186
MD	Maryland	NaN	1	5	25	30	45	52	74	106	117	132	203	273	299	441	379	452	470	545	605	663
MA	Massachusetts	NaN	28	28	31	30	31	32	35	34	35	185	204	254	356	405	444	495	568	628	685	791
MI	Michigan	16	19	24	90	87	128	157	181	214	268	305	397	525	536	694	789	844	942	1015	1030	1124
MN	Minnesota	18	14	21	28	41	68	65	112	145	141	197	289	375	502	594	687	766	842	884	1014	1080
MS	Mississippi	NaN	NaN	1	5	13	19	17	29	32	23	16	42	42	52	57	57	77	103	137	172	214
MO	Missouri	16	18	18	35	41	52	56	59	72	79	141	158	217	256	305	316	376	431	416	515	613
MT	Montana	NaN	1	4	1	1	6	4	2	12	7	18	14	12	22	17	25	26	36	45	41	30
NE	Nebraska	NaN	NaN	NaN	7	11	9	9	11	16	20	25	36	42	63	72	78	100	112	120	156	164
NV	Nevada	NaN	NaN	2	7	4	7	5	6	14	15	27	45	62	54	97	120	143	157	173	207	204
NH	New Hampshire	NaN	NaN	NaN	NaN	3	3	7	6	17	20	23	27	61	63	84	71	83	93	110	135	133
NJ	New Jersey	14	19	25	35	64	54	62	84	122	142	166	216	269	388	477	516	592	573	688	771	943
NM	New Mexico	1	1	2	2	2	9	10	15	15	16	22	31	20	23	34	43	55	56	87	103	133
NY	New York	NaN	76	88	99	147	127	139	206	187	223	274	340	408	513	603	714	1156	1099	1296	1393	1551
NC	North Carolina	40	46	61	54	73	80	126	139	112	112	218	248	343	386	481	468	561	637	692	814	883
ND	North Dakota	NaN	2	2	1	1	3	4	11	3	6	12	9	20	21	25	26	29	39	40	56	54
OH	Ohio	NaN	2	5	5	6	16	29	64	94	116	191	242	345	503	595	783	766	849	1046	1148	1341
OK	Oklahoma	NaN	NaN	2	7	24	16	19	27	28	26	52	60	73	112	115	142	168	189	205	248	311
OR	Oregon	NaN	1	19	48	108	90	95	124	162	173	212	256	306	354	408	424	428	526	558	571	641
PA	Pennsylvania	NaN	10	23	48	65	90	88	129	172	210	241	277	408	512	663	736	866	945	1045	1297	1582
RI	Rhode Island	1	1	1	1	2	7	4	6	10	16	29	32	46	52	69	83	88	113	135	143	143
SC	South Carolina	2	10	7	11	11	21	28	39	43	52	79	68	97	101	126	135	156	177	178	243	263
SD	South Dakota	4	NaN	2	6	3	3	10	9	10	8	19	23	25	26	36	40	37	41	34	39	47
TN	Tennessee	17	18	15	23	37	41	27	40	50	55	74	95	120	159	207	211	262	305	331	385	466
TX	Texas	NaN	95	109	125	166	175	207	295	315	370	426	537	759	930	1099	1290	1423	1641	1824	2090	2436
UT	Utah	NaN	7	13	10	11	13	17	24	19	27	34	50	79	104	133	179	207	199	241	281	314
VT	Vermont	NaN	1	2	NaN	8	7	7	9	11	14	14	17	20	20	31	45	NaN	NaN	51	52	71
VA	Virginia	20	35	35	49	37	74	65	75	122	102	129	191	267	325	376	469	504	590	667	748	914
WA	Washington	NaN	27	4	8	12	27	24	50	74	101	139	171	209	282	387	401	413	488	540	550	692
WV	West Virginia	4	4	14	11	9	10	12	9	10	18	21	28	25	39	57	54	64	67	85	98	84
WI	Wisconsin	NaN	3	2	16	26	41	54	62	94	111	115	188	272	306	366	408	443	456	523	584	631
WY	Wyoming	NaN	1	1	3	2	6	2	4	7	5	3	3	12	13	25	25	NaN	41	37	NaN	46

## Sheet: Age14
ST	State\Report Year	1991	1992	1993	1994	1995	1996	1997	1998	1999	2000	2001	2002	2003	2004	2005	2006	2007	2008	2009	2010	2011
AL	Alabama	NaN	5	5	9	10	14	23	14	26	59	46	63	77	96	146	162	191	179	250	250	320
AK	Alaska	NaN	NaN	1	NaN	3	3	5	6	8	10	14	10	13	21	35	44	38	37	42	47	67
AZ	Arizona	11	13	10	13	16	16	27	31	39	66	62	86	108	151	193	290	271	317	387	465	522
AR	Arkansas	1	1	5	6	9	8	11	10	26	23	45	54	67	76	116	143	130	144	142	191	211
CA	California	NaN	81	106	109	145	184	202	266	365	435	538	751	1044	1300	1659	2081	2341	2744	3010	3311	3862
CO	Colorado	NaN	NaN	1	2	5	4	9	8	20	20	33	36	46	82	73	132	125	165	189	204	271
CT	Connecticut	12	10	10	13	13	27	48	34	47	61	90	106	129	139	201	234	236	277	338	358	423
DE	Delaware	1	1	NaN	2	9	9	12	16	9	19	16	15	23	24	36	39	53	51	54	45	61
DC	District of Columbia	NaN	NaN	NaN	2	4	2	4	2	5	6	5	13	18	17	NaN	13	NaN	NaN	NaN	33	30
FL	Florida	NaN	31	37	47	90	77	100	131	149	169	193	263	291	385	448	568	679	731	863	985	1137
GA	Georgia	NaN	20	17	19	26	21	43	46	68	68	95	140	220	318	381	483	547	611	708	765	865
HI	Hawaii	NaN	1	2	2	2	4	5	5	6	12	14	36	37	50	53	76	59	75	71	67	81
ID	Idaho	2	1	4	3	10	8	6	16	11	18	17	25	35	57	74	101	87	132	141	120	128
IL	Illinois	4	1	4	52	56	74	77	109	142	179	184	254	349	433	553	666	726	871	932	990	1109
IN	Indiana	6	14	23	38	57	75	78	99	117	137	187	236	304	389	468	562	663	689	832	807	898
IA	Iowa	NaN	2	12	21	19	33	28	37	34	35	44	90	98	113	103	110	94	61	57	58	55
KS	Kansas	NaN	2	6	10	20	17	8	18	25	36	42	38	49	74	114	109	139	135	153	167	168
KY	Kentucky	NaN	NaN	3	4	7	15	12	15	29	31	46	60	80	107	145	159	177	176	196	265	272
LA	Louisiana	NaN	16	24	28	38	45	44	61	61	66	81	77	100	115	98	139	179	157	159	204	217
ME	Maine	4	2	1	3	5	7	13	19	19	25	30	45	38	44	85	104	99	114	128	160	164
MD	Maryland	NaN	NaN	8	10	36	38	52	58	83	111	141	146	205	287	315	440	388	497	487	563	620
MA	Massachusetts	NaN	27	27	30	30	30	32	32	34	33	129	200	254	260	359	420	475	501	568	647	718
MI	Michigan	4	19	21	91	91	91	138	171	197	220	278	330	411	536	568	734	805	895	980	1027	1059
MN	Minnesota	13	15	20	27	34	42	78	71	120	150	175	229	330	452	552	627	749	796	867	912	1035
MS	Mississippi	NaN	NaN	1	2	5	12	21	14	28	27	20	18	43	46	51	62	64	82	119	144	186
MO	Missouri	14	20	20	19	30	49	52	52	58	79	90	135	162	218	260	319	329	379	452	444	536
MT	Montana	NaN	NaN	3	3	3	3	5	3	2	13	10	18	17	16	23	NaN	29	NaN	36	47	32
NE	Nebraska	NaN	NaN	NaN	1	9	10	10	12	11	18	25	29	35	48	67	71	92	121	125	119	168
NV	Nevada	NaN	NaN	2	2	2	5	8	6	8	15	18	36	44	70	58	96	127	156	171	178	215
NH	New Hampshire	NaN	NaN	NaN	NaN	1	9	6	8	10	18	24	23	30	58	68	92	82	85	98	123	143
NJ	New Jersey	6	21	27	31	36	53	53	66	87	124	145	177	226	275	404	480	529	524	622	712	769
NM	New Mexico	1	2	3	2	4	2	10	7	13	18	15	28	33	26	28	46	56	72	67	88	113
NY	New York	NaN	91	105	131	188	170	186	275	251	298	366	455	545	686	807	954	1017	1161	1155	1300	1384
NC	North Carolina	37	44	50	60	60	81	85	136	131	131	151	230	253	377	407	507	491	587	659	733	842
ND	North Dakota	NaN	1	2	4	3	1	3	7	11	4	7	12	12	19	25	33	26	31	41	36	61
OH	Ohio	NaN	NaN	4	8	8	9	22	36	76	107	156	218	272	383	550	647	784	828	930	1084	1200
OK	Oklahoma	NaN	2	2	3	10	24	17	22	28	34	27	51	63	81	125	109	153	177	194	224	262
OR	Oregon	4	1	11	55	87	74	99	110	131	172	195	243	270	329	366	421	445	437	527	554	560
PA	Pennsylvania	NaN	10	13	45	51	58	90	95	112	151	194	270	291	419	519	704	802	931	967	1120	1384
RI	Rhode Island	1	2	1	2	1	4	9	4	9	14	19	26	33	53	60	84	85	97	108	134	158
SC	South Carolina	6	5	9	5	7	8	25	32	39	39	51	84	70	98	111	127	141	155	173	189	254
SD	South Dakota	NaN	5	1	3	6	5	3	9	12	11	10	18	25	29	32	36	42	36	40	33	41
TN	Tennessee	25	13	16	23	28	39	40	26	41	41	64	71	100	140	169	212	233	287	343	350	406
TX	Texas	NaN	98	97	117	137	165	174	207	286	313	380	479	582	826	961	1146	1327	1476	1683	1882	2173
UT	Utah	NaN	4	8	14	10	11	14	23	22	20	21	42	56	89	102	151	199	221	215	260	277
VT	Vermont	NaN	NaN	NaN	2	NaN	8	7	9	11	17	21	14	12	22	17	31	NaN	NaN	56	51	58
VA	Virginia	21	21	43	38	49	41	71	57	82	113	122	146	209	306	355	385	495	503	606	697	778
WA	Washington	NaN	27	5	5	13	22	29	25	57	65	106	143	187	231	300	396	428	434	523	565	563
WV	West Virginia	2	3	14	7	10	9	10	12	10	9	18	23	28	26	39	56	47	67	74	89	100
WI	Wisconsin	NaN	NaN	2	13	26	20	38	46	67	71	127	131	210	285	327	372	428	469	480	547	611
WY	Wyoming	NaN	NaN	1	1	3	3	7	3	4	7	5	4	4	NaN	19	26	26	19	43	NaN	42

[truncated: 3 more sheets: Age15, Age16, Age17]
